# Supplementary material
Source: MDPI journal article supplement (https://www.mdpi.com/2075-5309/14/3/623)
Supplement: s1 [file s1]

Table S1 Related specification document of BIPV

| Serial number | Name of the normative document                                                                                          | Document number                                         |
|---------------|-------------------------------------------------------------------------------------------------------------------------|---------------------------------------------------------|
| 1             | The Code of Practice for Operation and Maintenance of Photovoltaic Building Integration Systems                         | JGJ/T 264-2012                                          |
| 2             | Technical Specifications for the Application of Solar Photovoltaic Systems in Civil Buildings                           | JGJ 203-2010                                            |
| 3             | Technical Specifications for Centralized Operation and Maintenance of Distributed Photovoltaic Power Generation Systems | GB/T 38946-2020                                         |
| 4             | Electrical Design specifications for Solar photovoltaic glass curtain wall                                              | JGJ/T 365-2015                                          |
| 5             | General technology of photovoltaic solar shading components for buildings                                               | JG/T 482-2015                                           |
| 6             | General Technical Requirements for the Components of Photovoltaic Building                                              | JG/T 492-2016                                           |
| 7             | Flexible thin-film photovoltaic modules for buildings                                                                   | JG/T 535-2017                                           |
| 8             | Building Integrated Photovoltaic (BIPV) Module Cell Rated Operating Temperature Test Methods                            | GB/T 37052-2018                                         |
| 9             | Lightning protection Technical specifications for photovoltaic building integrated system                               | GB/T 36963-2018                                         |
| 10            | Photovoltaic solar shading panels for buildings                                                                         | GB/T 37268-2018                                         |
| 11            | Technical standards for Building a photovoltaic system                                                                  | GB/T 51368-2019                                         |
| 12            | Architectural solar photovoltaic laminated glass                                                                        | GB/T 29551-2013                                         |
| 13            | General Specifications for Energy Efficiency and use of Renewable Energy in Buildings                                   | GB 55015-2021                                           |
| 14            | Technical requirements for grid-connected photovoltaic systems                                                          | GB/T 19939-2005                                         |
| 15            | Photovoltaic devices Part 2: Requirements for standard solar cells                                                      | GB/T 64952-1996                                         |
| 16            | Technical regulations for the integration of solar photovoltaic power generation systems and buildings                  | CECS 418-2015                                           |
| 17            | Technical regulations governing Photovoltaic power generation system access to the distribution network                 | GBT 29319-2012                                          |
| 18            | Technical Guidelines for integrated application of Solar Photovoltaic and building                                      | CJS01-2010                                              |
| 19            | Standardization conditions for the Photovoltaic manufacturing industry                                                  | Ministry of Industry and Information Technology (abbr.) |
| 20            | Design Specifications for a Photovoltaic Power Plant                                                                    | GB50797                                                 |
| 21            | Specifications for Distributed power grid-connected operation control                                                   | GB/T33592                                               |
| 22            | Technical regulations governing Photovoltaic power generation system access to the distribution network                 | GB/T29319                                               |
| 23            | Acceptance criteria for photovoltaic and building-integrated power generation systems                                   | GB/T 37655-2019                                         |
| 24            | Technical standards for solar heating and heating engineering                                                           | GB5 0495-2019                                           |
| 25            | Uniform Standards for Quality Acceptance of Building Construction                                                       | GB 50300-2013                                           |

Table S2 Results of the first round of Expert Survey Method risk factor scores

| Risk number | Risk factors                                   | average value | standard deviation | coefficient of variation | result of judgment |
|-------------|------------------------------------------------|---------------|--------------------|--------------------------|--------------------|
| 1           | Consumer acceptance                            | 4.10          | 0.57               | 0.14                     | √                  |
| 2           | BIPV Market Supply                             | 3.77          | 0.50               | 0.13                     | √                  |
| 3           | Project finance                                | 4.23          | 0.53               | 0.13                     | √                  |
| 4           | Project location                               | 4.13          | 0.44               | 0.11                     | √                  |
| 5           | Level of regional development                  | 4.00          | 0.57               | 0.14                     | ○                  |
| 6           | Geographical conditions of the project         | 3.93          | 0.53               | 0.13                     | ○                  |
| 7           | Incremental cost                               | 3.87          | 0.67               | 0.17                     | √                  |
| 8           | Energy conservation and environmental benefits | 3.34          | 0.27               | 0.08                     | ×                  |
| 9           | Feed-in tariff                                 | 3.93          | 0.62               | 0.16                     | √                  |
| 10          | Risk of changes in policies and regulations    | 4.03          | 0.79               | 0.20                     | √                  |
| 11          | Master Plan Design                             | 4.03          | 0.61               | 0.15                     | √                  |
| 12          | Load forecasting                               | 3.57          | 0.56               | 0.16                     | √                  |
| 13          | Poor program design                            | 4.10          | 0.63               | 0.15                     | √                  |
| 14          | Project Integration Design                     | 4.07          | 0.53               | 0.13                     | √                  |
| 15          | Tendering methods and contractor qualification | 3.53          | 0.58               | 0.16                     | √                  |
| 16          | Inadequate design codes and standards          | 3.97          | 0.55               | 0.14                     | √                  |
| 17          | Security management                            | 3.67          | 0.67               | 0.18                     | √                  |
| 18          | Relaying protection measures                   | 3.50          | 0.38               | 0.11                     | ○                  |
| 19          | Inadequate quality acceptance criteria         | 3.70          | 0.53               | 0.14                     | √                  |
| 20          | Quality management                             | 3.10          | 0.34               | 0.11                     | ○                  |
| 21          | Cost management                                | 3.53          | 0.69               | 0.20                     | √                  |
| 22          | Progress management                            | 3.57          | 0.53               | 0.15                     | √                  |
| 23          | Contract management                            | 3.67          | 0.62               | 0.17                     | √                  |
| 24          | Technical risk of PV equipment maintenance     | 3.60          | 0.57               | 0.16                     | √                  |



Table S6 Risk assessment index

| Standardized layer                              | Serial number | Indicator layer                                                                      |
|-------------------------------------------------|---------------|--------------------------------------------------------------------------------------|
| Pre-decision stage exposures<br>R1              | R11           | Risk of inadequate policies and regulations (                                        |
|                                                 | R12           | BIPV market supply risk                                                              |
|                                                 | R13           | Project finance risk                                                                 |
|                                                 | R14           | Site selection risk                                                                  |
|                                                 | R15           | Risk of consumer acceptance                                                          |
|                                                 | R16           | Feed-in tariff risk                                                                  |
|                                                 | R17           | Incremental cost risk                                                                |
| Preparation and design phase exposures<br>R2    | R21           | Risk of poor project master planning                                                 |
|                                                 | R22           | Risk of load forecasting accuracy                                                    |
|                                                 | R23           | Risk of poor project program design                                                  |
|                                                 | R24           | Risk to the level of integrated project design                                       |
|                                                 | R25           | Tendering methods and contractor qualification risks                                 |
|                                                 | R26           | Risk of not improving design codes, standards and related atlases                    |
|                                                 | R31           | Construction safety risk                                                             |
| Project implementation phase exposures<br>R3    | R32           | Risk of inadequate quality acceptance criteria                                       |
|                                                 | R33           | Risks in construction cost management                                                |
|                                                 | R34           | Risks of construction schedule management                                            |
|                                                 | R35           | Construction contract management risk                                                |
|                                                 | R41           | Risk of not having well-established technical standards for PV equipment maintenance |
| Operation and maintenance phase exposures<br>R4 | R42           | Grid acceptance and commissioning risk                                               |
|                                                 | R43           | Risk of regular billing for electricity                                              |
|                                                 | R44           | Risk of inoperability due to natural disasters                                       |
|                                                 |               |                                                                                      |

Table S7 Direct influence matrix

|     | R11 | R12 | R13 | R14 | R15 | R16 | R17 | R21 | R22 | R23 | R24 | R25 | R26 | R31 | R32 | R33 | R34 | R35 | R41 | R42 | R43 | R44 |
|-----|-----|-----|-----|-----|-----|-----|-----|-----|-----|-----|-----|-----|-----|-----|-----|-----|-----|-----|-----|-----|-----|-----|
| R11 | 0   | 0   | 1   | 1   | 0   | 0   | 1   | 1   | 0   | 0   | 0   | 0   | 0   | 0   | 0   | 0   | 0   | 0   | 0   | 0   | 0   | 0   |
| R12 | 0   | 0   | 1   | 0   | 0   | 1   | 0   | 0   | 0   | 1   | 0   | 0   | 0   | 0   | 0   | 1   | 1   | 0   | 0   | 1   | 0   | 0   |
| R13 | 2   | 0   | 0   | 0   | 0   | 0   | 0   | 0   | 0   | 0   | 0   | 0   | 0   | 0   | 0   | 0   | 0   | 0   | 0   | 0   | 0   | 0   |
| R14 | 3   | 0   | 0   | 0   | 0   | 0   | 0   | 2   | 0   | 0   | 0   | 0   | 0   | 0   | 0   | 1   | 0   | 0   | 0   | 0   | 0   | 1   |
| R15 | 0   | 0   | 3   | 0   | 0   | 0   | 0   | 0   | 0   | 0   | 0   | 0   | 0   | 0   | 0   | 1   | 0   | 0   | 0   | 0   | 0   | 0   |
| R16 | 0   | 0   | 3   | 2   | 0   | 0   | 0   | 0   | 0   | 0   | 0   | 0   | 0   | 0   | 0   | 0   | 0   | 0   | 0   | 0   | 0   | 0   |
| R17 | 3   | 1   | 1   | 1   | 0   | 1   | 0   | 0   | 0   | 0   | 0   | 1   | 2   | 0   | 2   | 0   | 0   | 1   | 0   | 0   | 0   | 0   |
| R21 | 0   | 0   | 0   | 0   | 0   | 0   | 0   | 0   | 0   | 0   | 0   | 0   | 0   | 0   | 0   | 1   | 1   | 0   | 0   | 2   | 0   | 0   |
| R22 | 0   | 0   | 1   | 0   | 0   | 0   | 0   | 0   | 0   | 0   | 0   | 0   | 0   | 0   | 0   | 0   | 0   | 0   | 0   | 1   | 0   | 0   |
| R23 | 0   | 0   | 0   | 0   | 1   | 0   | 0   | 0   | 0   | 0   | 0   | 0   | 0   | 1   | 0   | 1   | 1   | 0   | 0   | 1   | 1   | 1   |
| R24 | 1   | 0   | 0   | 0   | 1   | 0   | 0   | 0   | 0   | 2   | 0   | 1   | 0   | 1   | 0   | 0   | 1   | 1   | 0   | 0   | 0   | 0   |
| R25 | 1   | 0   | 0   | 0   | 0   | 0   | 0   | 0   | 0   | 0   | 3   | 0   | 0   | 0   | 0   | 0   | 0   | 2   | 0   | 0   | 0   | 0   |
| R26 | 0   | 0   | 0   | 0   | 0   | 0   | 0   | 0   | 0   | 2   | 3   | 0   | 0   | 1   | 1   | 0   | 0   | 0   | 1   | 0   | 0   | 0   |
| R31 | 0   | 0   | 0   | 0   | 0   | 0   | 0   | 0   | 0   | 0   | 0   | 0   | 0   | 0   | 0   | 1   | 1   | 1   | 0   | 0   | 0   | 0   |
| R32 | 0   | 0   | 0   | 0   | 0   | 0   | 0   | 0   | 0   | 0   | 0   | 0   | 0   | 0   | 0   | 0   | 0   | 0   | 0   | 3   | 0   | 0   |
| R33 | 0   | 0   | 0   | 0   | 0   | 0   | 0   | 0   | 0   | 0   | 0   | 0   | 0   | 0   | 0   | 0   | 1   | 0   | 0   | 0   | 0   | 0   |
| R34 | 0   | 0   | 0   | 0   | 0   | 0   | 0   | 0   | 0   | 0   | 0   | 0   | 0   | 0   | 0   | 0   | 0   | 1   | 0   | 0   | 0   | 0   |
| R35 | 0   | 0   | 0   | 0   | 0   | 0   | 0   | 0   | 0   | 0   | 0   | 0   | 0   | 0   | 0   | 1   | 1   | 0   | 0   | 0   | 0   | 0   |
| R41 | 1   | 0   | 0   | 0   | 0   | 0   | 0   | 0   | 0   | 0   | 0   | 0   | 0   | 0   | 0   | 0   | 0   | 0   | 0   | 1   | 2   | 1   |
| R42 | 0   | 0   | 0   | 0   | 0   | 0   | 0   | 0   | 0   | 0   | 0   | 0   | 0   | 0   | 0   | 0   | 0   | 0   | 0   | 0   | 1   | 0   |
| R43 | 0   | 0   | 3   | 0   | 0   | 0   | 0   | 0   | 0   | 0   | 0   | 0   | 0   | 0   | 0   | 0   | 0   | 0   | 0   | 0   | 0   | 0   |
| R44 | 1   | 0   | 0   | 1   | 0   | 0   | 0   | 0   | 0   | 0   | 0   | 0   | 0   | 1   | 0   | 1   | 1   | 0   | 0   | 0   | 1   | 0   |

Table S8 The Gauge influence matrix

|     | R11  | R12  | R13  | R14  | R15  | R16  | R17  | R21  | R22 | R23  | R24  | R25  | R26  | R31  | R32  | R33  | R34  | R35  | R41  | R42  | R43  | R44  |
|-----|------|------|------|------|------|------|------|------|-----|------|------|------|------|------|------|------|------|------|------|------|------|------|
| R11 | 0    | 0    | 0.07 | 0.07 | 0    | 0    | 0.07 | 0.07 | 0   | 0    | 0    | 0    | 0    | 0    | 0    | 0    | 0    | 0    | 0    | 0    | 0    | 0    |
| R12 | 0    | 0    | 0.07 | 0    | 0    | 0.07 | 0    | 0    | 0   | 0.07 | 0    | 0    | 0    | 0    | 0    | 0.07 | 0.07 | 0    | 0    | 0.07 | 0    | 0    |
| R13 | 0.14 | 0    | 0    | 0    | 0    | 0    | 0    | 0    | 0   | 0    | 0    | 0    | 0    | 0    | 0    | 0    | 0    | 0    | 0    | 0    | 0    | 0    |
| R14 | 0.21 | 0    | 0    | 0    | 0    | 0    | 0    | 0.14 | 0   | 0    | 0    | 0    | 0    | 0    | 0    | 0.07 | 0    | 0    | 0    | 0    | 0    | 0.07 |
| R15 | 0    | 0    | 0.21 | 0    | 0    | 0    | 0    | 0    | 0   | 0    | 0    | 0    | 0    | 0    | 0    | 0.07 | 0    | 0    | 0    | 0    | 0    | 0    |
| R16 | 0    | 0    | 0.21 | 0.14 | 0    | 0    | 0    | 0    | 0   | 0    | 0    | 0    | 0    | 0    | 0    | 0    | 0    | 0    | 0    | 0    | 0    | 0    |
| R17 | 0.21 | 0.07 | 0.07 | 0.07 | 0    | 0.07 | 0    | 0    | 0   | 0    | 0    | 0.07 | 0.14 | 0    | 0.14 | 0    | 0    | 0.07 | 0    | 0    | 0    | 0    |
| R21 | 0    | 0    | 0    | 0    | 0    | 0    | 0    | 0    | 0   | 0    | 0    | 0    | 0    | 0    | 0    | 0.07 | 0.07 | 0    | 0    | 0.14 | 0    | 0    |
| R22 | 0    | 0    | 0.07 | 0    | 0    | 0    | 0    | 0    | 0   | 0    | 0    | 0    | 0    | 0    | 0    | 0    | 0    | 0    | 0    | 1    | 0    | 0    |
| R23 | 0    | 0    | 0    | 0    | 0.07 | 0    | 0    | 0    | 0   | 0    | 0    | 0    | 0    | 0.07 | 0    | 0.07 | 0.07 | 0    | 0    | 0.07 | 0.07 | 0.07 |
| R24 | 0.07 | 0    | 0    | 0    | 0.07 | 0    | 0    | 0    | 0   | 0.14 | 0    | 0.07 | 0    | 0.07 | 0    | 0    | 0.07 | 0.07 | 0    | 0    | 0    | 0    |
| R25 | 0.07 | 0    | 0    | 0    | 0    | 0    | 0    | 0    | 0   | 0    | 0.21 | 0    | 0    | 0    | 0    | 0    | 0    | 0.14 | 0    | 0    | 0    | 0    |
| R26 | 0    | 0    | 0    | 0    | 0    | 0    | 0    | 0    | 0   | 0.14 | 0.21 | 0    | 0    | 0.07 | 0.07 | 0    | 0    | 0    | 0.07 | 0    | 0    | 0    |
| R31 | 0    | 0    | 0    | 0    | 0    | 0    | 0    | 0    | 0   | 0    | 0    | 0    | 0    | 0    | 0    | 0.07 | 0.07 | 0.07 | 0    | 0    | 0    | 0    |
| R32 | 0    | 0    | 0    | 0    | 0    | 0    | 0    | 0    | 0   | 0    | 0    | 0    | 0    | 0    | 0    | 0    | 0    | 0    | 0    | 3    | 0    | 0    |
| R33 | 0    | 0    | 0    | 0    | 0    | 0    | 0    | 0    | 0   | 0    | 0    | 0    | 0    | 0    | 0    | 0    | 0.07 | 0    | 0    | 0    | 0    | 0    |
| R34 | 0    | 0    | 0    | 0    | 0    | 0    | 0    | 0    | 0   | 0    | 0    | 0    | 0    | 0    | 0    | 0    | 0    | 0.07 | 0    | 0    | 0    | 0    |
| R35 | 0    | 0    | 0    | 0    | 0    | 0    | 0    | 0    | 0   | 0    | 0    | 0    | 0    | 0    | 0    | 0.07 | 0.07 | 0    | 0    | 0    | 0    | 0    |
| R41 | 0.07 | 0    | 0    | 0    | 0    | 0    | 0    | 0    | 0   | 0    | 0    | 0    | 0    | 0    | 0    | 0    | 0    | 0    | 0    | 0.07 | 0.14 | 0.07 |
| R42 | 0    | 0    | 0    | 0    | 0    | 0    | 0    | 0    | 0   | 0    | 0    | 0    | 0    | 0    | 0    | 0    | 0    | 0    | 0    | 0    | 0.07 | 0    |
| R43 | 0    | 0    | 0.21 | 0    | 0    | 0    | 0    | 0    | 0   | 0    | 0    | 0    | 0    | 0    | 0    | 0    | 0    | 0    | 0    | 0    | 0    | 0    |
| R44 | 0.07 | 0    | 0    | 0.07 | 0    | 0    | 0    | 0    | 0   | 0    | 0    | 0    | 0    | 0.07 | 0    | 0.07 | 0.07 | 0    | 0    | 0    | 0.07 | 0    |

Table S9 The Comprehensive influence matrix

|     | R11  | R12  | R13  | R14  | R15  | R16  | R17  | R21  | R22 | R23  | R24  | R25  | R26  | R31  | R32  | R33  | R34  | R35  | R41  | R42  | R43  | R44  |
|-----|------|------|------|------|------|------|------|------|-----|------|------|------|------|------|------|------|------|------|------|------|------|------|
| R11 | 0.05 | 0.01 | 0.08 | 0.08 | 0    | 0.01 | 0.07 | 0.09 | 0   | 0    | 0    | 0.01 | 0.01 | 0    | 0.01 | 0.01 | 0.01 | 0.01 | 0    | 0.02 | 0.01 | 0.01 |
| R12 | 0.02 | 0    | 0.09 | 0.01 | 0.01 | 0.07 | 0    | 0    | 0   | 0.07 | 0    | 0    | 0    | 0.01 | 0    | 0.08 | 0.08 | 0.01 | 0    | 0.01 | 0.01 | 0.01 |
| R13 | 0.15 | 0    | 0.01 | 0.01 | 0    | 0    | 0.01 | 0.01 | 0   | 0    | 0    | 0    | 0    | 0    | 0    | 0    | 0    | 0    | 0    | 0    | 0    | 0    |
| R14 | 0.23 | 0    | 0.02 | 0.02 | 0    | 0    | 0.02 | 0.16 | 0   | 0    | 0    | 0    | 0    | 0.01 | 0    | 0.09 | 0.02 | 0    | 0    | 0    | 0    | 0.07 |
| R15 | 0.03 | 0    | 0.22 | 0    | 0    | 0    | 0    | 0    | 0   | 0    | 0    | 0    | 0    | 0    | 0    | 0.07 | 0.01 | 0    | 0    | 0    | 0    | 0    |
| R16 | 0.07 | 0    | 0.24 | 0.15 | 0    | 0    | 0    | 0.03 | 0   | 0    | 0    | 0    | 0    | 0    | 0    | 0.01 | 0    | 0    | 0    | 0    | 0.07 | 0.01 |
| R17 | 0.27 | 0.07 | 0.13 | 0.10 | 0.01 | 0.08 | 0.02 | 0.03 | 0   | 0.05 | 0.05 | 0.08 | 0.15 | 0.02 | 0.16 | 0.02 | 0.02 | 0.09 | 0.01 | 0.04 | 0.09 | 0.01 |
| R21 | 0    | 0    | 0    | 0    | 0    | 0    | 0    | 0    | 0   | 0    | 0    | 0    | 0    | 0    | 0    | 0.08 | 0.08 | 0.01 | 0    | 0.14 | 0.01 | 0    |
| R22 | 0.01 | 0    | 0.07 | 0    | 0    | 0    | 0    | 0    | 0   | 0    | 0    | 0    | 0    | 0    | 0    | 0    | 0    | 0    | 0    | 0.07 | 0.01 | 0    |
| R23 | 0.01 | 0    | 0.03 | 0.01 | 0.07 | 0    | 0    | 0    | 0   | 0    | 0    | 0    | 0    | 0.08 | 0    | 0.09 | 0.09 | 0.01 | 0    | 0.07 | 0.08 | 0.07 |
| R24 | 0.09 | 0    | 0.03 | 0.01 | 0.09 | 0    | 0.01 | 0.01 | 0   | 0.22 | 0.02 | 0.07 | 0    | 0.09 | 0    | 0.04 | 0.11 | 0.10 | 0    | 0.02 | 0.02 | 0.02 |
| R25 | 0.09 | 0    | 0.01 | 0.01 | 0.02 | 0    | 0.01 | 0.01 | 0   | 0.05 | 0.22 | 0.02 | 0    | 0.02 | 0    | 0.01 | 0.03 | 0.16 | 0    | 0    | 0    | 0    |
| R26 | 0.09 | 0    | 0.02 | 0    | 0.03 | 0    | 0    | 0    | 0   | 0.26 | 0.22 | 0.02 | 0    | 0.11 | 0.07 | 0.03 | 0.05 | 0.03 | 0.07 | 0.04 | 0.03 | 0.02 |
| R31 | 0.03 | 0    | 0    | 0    | 0    | 0    | 0    | 0    | 0   | 0    | 0    | 0    | 0    | 0    | 0    | 0.08 | 0.08 | 0.08 | 0    | 0    | 0    | 0    |
| R32 | 0    | 0    | 0    | 0    | 0    | 0    | 0    | 0    | 0   | 0    | 0    | 0    | 0    | 0    | 0    | 0    | 0    | 0    | 0    | 0.21 | 0.02 | 0    |
| R33 | 0    | 0    | 0    | 0    | 0    | 0    | 0    | 0    | 0   | 0    | 0    | 0    | 0    | 0    | 0    | 0.01 | 0.07 | 0.01 | 0    | 0    | 0    | 0    |
| R34 | 0    | 0    | 0    | 0    | 0    | 0    | 0    | 0    | 0   | 0    | 0    | 0    | 0    | 0    | 0    | 0.07 | 0.01 | 0.07 | 0    | 0    | 0    | 0    |
| R35 | 0    | 0    | 0    | 0    | 0    | 0    | 0    | 0    | 0   | 0    | 0    | 0    | 0    | 0    | 0    | 0.01 | 0.07 | 0.01 | 0    | 0    | 0    | 0    |
| R41 | 0.09 | 0    | 0.04 | 0.01 | 0    | 0    | 0.01 | 0.01 | 0   | 0    | 0    | 0    | 0    | 0.01 | 0    | 0.01 | 0.01 | 0    | 0    | 0.07 | 0.15 | 0.07 |
| R42 | 0    | 0    | 0.02 | 0    | 0    | 0    | 0    | 0    | 0   | 0    | 0    | 0    | 0    | 0    | 0    | 0    | 0    | 0    | 0    | 0    | 0.07 | 0    |
| R43 | 0.03 | 0    | 0.22 | 0    | 0    | 0    | 0    | 0    | 0   | 0    | 0    | 0    | 0    | 0    | 0    | 0    | 0    | 0    | 0    | 0    | 0    | 0    |
| R44 | 0.09 | 0    | 0.02 | 0.08 | 0    | 0    | 0.01 | 0.02 | 0   | 0    | 0    | 0    | 0    | 0.07 | 0    | 0.09 | 0.09 | 0.01 | 0    | 0    | 0.07 | 0.01 |

Table S10 The Unweighted super matrix

|     | R11  | R12  | R13  | R14  | R15  | R16  | R17  | R21  | R22  | R23  | R24  | R25  | R26  | R31  | R32  | R33  | R34  | R35  | R41  | R42  | R43  | R44  |
|-----|------|------|------|------|------|------|------|------|------|------|------|------|------|------|------|------|------|------|------|------|------|------|
| R11 | 0    | 0    | 1.00 | 1.00 | 0    | 0    | 0.53 | 0    | 0    | 0    | 0.50 | 1.00 | 0    | 0    | 1.00 | 0    | 0    | 0    | 0.67 | 0    | 0    | 0.50 |
| R12 | 0    | 0    | 0    | 0    | 0    | 0    | 0.13 | 0    | 0    | 0    | 0    | 0    | 0    | 0    | 0    | 0    | 0    | 0    | 0    | 0    | 0    | 0    |
| R13 | 0.33 | 0.50 | 0    | 0    | 1.00 | 0.75 | 0.12 | 0    | 1.00 | 0    | 0    | 0    | 0    | 0    | 0    | 0    | 0    | 0    | 0    | 0    | 1.00 | 0    |
| R14 | 0.33 | 0    | 0    | 0    | 0    | 0.25 | 0.12 | 0    | 0    | 0    | 0    | 0    | 0    | 0    | 0    | 0    | 0    | 0    | 0    | 0    | 0    | 0.50 |
| R15 | 0    | 0    | 0    | 0    | 0    | 0    | 0    | 0    | 0    | 1.00 | 0.50 | 0    | 0    | 0    | 0    | 1.00 | 1.00 | 0    | 0    | 0    | 0    | 0    |
| R16 | 0    | 0.50 | 0    | 0    | 0    | 0    | 0.12 | 0    | 0    | 0    | 0    | 0    | 0    | 0    | 0    | 0    | 0    | 0    | 0    | 0    | 0    | 0    |
| R17 | 0.33 | 0    | 0    | 0    | 0    | 0    | 0    | 0    | 0    | 0    | 0    | 0    | 0    | 0    | 0    | 0    | 0    | 0    | 0    | 0    | 0    | 0    |
| R21 | 1.00 | 0    | 0    | 1.00 | 0    | 0    | 0    | 0    | 0    | 0    | 0    | 0    | 0    | 0    | 0    | 0    | 0    | 0    | 0    | 0    | 0    | 0    |
| R22 | 0    | 0    | 0    | 0    | 0    | 0    | 0    | 0    | 0    | 0    | 0    | 0    | 0    | 0    | 0    | 0    | 0    | 0    | 0    | 1.00 | 0    | 0    |
| R23 | 0    | 1.00 | 0    | 0    | 0    | 0    | 0    | 0    | 1.00 | 0    | 0.50 | 0    | 0.50 | 0    | 0    | 0    | 0    | 0    | 0    | 0    | 0    | 0    |
| R24 | 0    | 0    | 0    | 0    | 0    | 0    | 0    | 0    | 0    | 0    | 0    | 1.00 | 0.50 | 0    | 0    | 0    | 0    | 0    | 0    | 0    | 0    | 0    |
| R25 | 0    | 0    | 0    | 0    | 0    | 0    | 0    | 0    | 0    | 0    | 0.50 | 0    | 0    | 0    | 0    | 0    | 0    | 0    | 0.01 | 0    | 0    | 0    |
| R26 | 0    | 0    | 0    | 0    | 0    | 0    | 1.00 | 0    | 0    | 0    | 0    | 0    | 0    | 0    | 0    | 0    | 0    | 0    | 0    | 0    | 0    | 0    |
| R31 | 0    | 0.14 | 0    | 0    | 0    | 0    | 0    | 0    | 0    | 0.31 | 0.33 | 0    | 0.50 | 0    | 0    | 0    | 0    | 0    | 0    | 0    | 0    | 0.33 |
| R32 | 0    | 0    | 0    | 0    | 0    | 0    | 0.75 | 0    | 0    | 0.14 | 0    | 0    | 0.50 | 0    | 0    | 0    | 0    | 0    | 0    | 0    | 0    | 0    |
| R33 | 0    | 0.43 | 0    | 1.00 | 0    | 0    | 0    | 0.50 | 0    | 0.31 | 0    | 0    | 0    | 0.50 | 0    | 0    | 0.50 | 0.25 | 0    | 0    | 0    | 0.33 |
| R34 | 0    | 0.43 | 0    | 0    | 0    | 0    | 0    | 0.50 | 0    | 0.24 | 0.33 | 0    | 0    | 0.50 | 0    | 1.00 | 0    | 0.75 | 0    | 0    | 0    | 0.33 |
| R35 | 0    | 0    | 0    | 0    | 0    | 0    | 0.25 | 0    | 0    | 0    | 0.33 | 0    | 0    | 0    | 0    | 0    | 0.50 | 0    | 0    | 0    | 0    | 0    |
| R41 | 0    | 0    | 0    | 0    | 0    | 0    | 0    | 0    | 0    | 0    | 0    | 0    | 0.75 | 0    | 0    | 0    | 0    | 0    | 0    | 0    | 0    | 0    |
| R42 | 0    | 0    | 0    | 0    | 0    | 0    | 0.25 | 0.83 | 1.00 | 0.33 | 0    | 0    | 0    | 0    | 0.83 | 0    | 0    | 0    | 0.50 | 0    | 0    | 0.25 |
| R43 | 0    | 0    | 0    | 0    | 0    | 1.00 | 0.75 | 0    | 0    | 0.33 | 0    | 0    | 0    | 0    | 0    | 0    | 0    | 0    | 0    | 1.00 | 0    | 0.75 |
| R44 | 0    | 0    | 0    | 0    | 0    | 0    | 0    | 0.17 | 0    | 0.33 | 1.00 | 0    | 0.25 | 0    | 0.17 | 0    | 0    | 0    | 0.50 | 0    | 0    | 0    |

Table S11 The Weighted super matrix

|     | R11  | R12  | R13  | R14  | R15  | R16  | R17  | R21  | R22  | R23  | R24  | R25  | R26  | R31  | R32  | R33  | R34  | R35  | R41  | R42  | R43  | R44  |
|-----|------|------|------|------|------|------|------|------|------|------|------|------|------|------|------|------|------|------|------|------|------|------|
| R11 | 0    | 0    | 1.00 | 0.49 | 0    | 0    | 0.21 | 0    | 0    | 0    | 0.20 | 0.58 | 0    | 0    | 0.72 | 0    | 0    | 0    | 0.67 | 0    | 0    | 0.28 |
| R12 | 0    | 0    | 0    | 0    | 0    | 0    | 0.05 | 0    | 0    | 0    | 0    | 0    | 0    | 0    | 0    | 0    | 0    | 0    | 0    | 0    | 0    | 0    |
| R13 | 0.19 | 0.25 | 0    | 0    | 1.00 | 0.51 | 0.05 | 0    | 0.45 | 0    | 0    | 0    | 0    | 0    | 0    | 0    | 0    | 0    | 0    | 0    | 1.00 | 0    |
| R14 | 0.19 | 0    | 0    | 0    | 0    | 0.17 | 0.05 | 0    | 0    | 0    | 0    | 0    | 0    | 0    | 0    | 0    | 0    | 0    | 0    | 0    | 0    | 0.28 |
| R15 | 0    | 0    | 0    | 0    | 0    | 0    | 0    | 0    | 0    | 0.56 | 0.20 | 0    | 0    | 0    | 0    | 0.76 | 0.76 | 0    | 0    | 0    | 0    | 0    |
| R16 | 0    | 0.25 | 0    | 0    | 0    | 0    | 0.05 | 0    | 0    | 0    | 0    | 0    | 0    | 0    | 0    | 0    | 0    | 0    | 0    | 0    | 0    | 0    |
| R17 | 0.19 | 0    | 0    | 0    | 0    | 0    | 0    | 0    | 0    | 0    | 0    | 0    | 0    | 0    | 0    | 0    | 0    | 0    | 0    | 0    | 0    | 0    |
| R21 | 0.42 | 0    | 0    | 0.36 | 0    | 0    | 0    | 0    | 0    | 0    | 0    | 0    | 0    | 0    | 0    | 0    | 0    | 0    | 0    | 0    | 0    | 0    |
| R22 | 0    | 0    | 0    | 0    | 0    | 0    | 0    | 0    | 0    | 0    | 0    | 0    | 0    | 0    | 0    | 0    | 0    | 0    | 0    | 0.60 | 0    | 0    |
| R23 | 0    | 0.36 | 0    | 0    | 0    | 0    | 0    | 0    | 0.33 | 0    | 0.15 | 0    | 0.24 | 0    | 0    | 0    | 0    | 0    | 0    | 0    | 0    | 0    |
| R24 | 0    | 0    | 0    | 0    | 0    | 0    | 0    | 0    | 0    | 0    | 0    | 0.42 | 0.24 | 0    | 0    | 0    | 0    | 0    | 0    | 0    | 0    | 0    |
| R25 | 0    | 0    | 0    | 0    | 0    | 0    | 0    | 0    | 0    | 0    | 0.04 | 0    | 0    | 0    | 0    | 0    | 0    | 0    | 0.01 | 0    | 0    | 0    |
| R26 | 0    | 0    | 0    | 0    | 0    | 0    | 0.29 | 0    | 0    | 0    | 0    | 0    | 0    | 0    | 0    | 0    | 0    | 0    | 0    | 0    | 0    | 0    |
| R31 | 0    | 0.02 | 0    | 0    | 0    | 0    | 0    | 0    | 0    | 0.05 | 0.04 | 0    | 0.10 | 0    | 0    | 0    | 0    | 0    | 0    | 0    | 0    | 0.06 |
| R32 | 0    | 0    | 0    | 0    | 0    | 0    | 0.09 | 0    | 0    | 0.02 | 0    | 0    | 0.10 | 0    | 0    | 0    | 0    | 0    | 0    | 0    | 0    | 0    |
| R33 | 0    | 0.06 | 0    | 0.15 | 0    | 0    | 0    | 0.19 | 0    | 0.05 | 0    | 0    | 0    | 0.50 | 0    | 0    | 0.12 | 0.25 | 0    | 0    | 0    | 0.06 |
| R34 | 0    | 0.06 | 0    | 0    | 0    | 0    | 0    | 0.19 | 0    | 0.04 | 0.04 | 0    | 0    | 0.50 | 0    | 0.24 | 0    | 0.75 | 0    | 0    | 0    | 0.06 |
| R35 | 0    | 0    | 0    | 0    | 0    | 0    | 0.03 | 0    | 0    | 0    | 0.04 | 0    | 0    | 0    | 0    | 0    | 0.12 | 0    | 0    | 0    | 0    | 0    |
| R41 | 0    | 0    | 0    | 0    | 0    | 0    | 0    | 0    | 0    | 0    | 0    | 0    | 0.24 | 0    | 0    | 0    | 0    | 0    | 0    | 0    | 0    | 0    |
| R42 | 0    | 0    | 0    | 0    | 0    | 0    | 0.05 | 0.51 | 0.22 | 0.09 | 0    | 0    | 0    | 0    | 0.24 | 0    | 0    | 0    | 0.16 | 0    | 0    | 0.07 |
| R43 | 0    | 0    | 0    | 0    | 0    | 0.33 | 0.14 | 0    | 0    | 0.09 | 0    | 0    | 0    | 0    | 0    | 0    | 0    | 0    | 0    | 0.40 | 0    | 0.20 |
| R44 | 0    | 0    | 0    | 0    | 0    | 0    | 0    | 0.10 | 0    | 0.09 | 0.19 | 0    | 0.08 | 0    | 0.05 | 0    | 0    | 0    | 0.16 | 0    | 0    | 0    |

Table S12 The Limiting super matrix

|     | R11   | R12   | R13   | R14   | R15   | R16   | R17   | R21   | R22   | R23   | R24   | R25   | R26   | R31   | R32   | R33   | R34   | R35   | R41   | R42   | R43   | R44   |
|-----|-------|-------|-------|-------|-------|-------|-------|-------|-------|-------|-------|-------|-------|-------|-------|-------|-------|-------|-------|-------|-------|-------|
| R11 | 0.226 | 0.226 | 0.226 | 0.226 | 0.226 | 0.226 | 0.226 | 0.226 | 0.226 | 0.226 | 0.226 | 0.226 | 0.226 | 0.226 | 0.226 | 0.226 | 0.226 | 0.226 | 0.226 | 0.226 | 0.226 | 0.226 |
| R12 | 0.002 | 0.002 | 0.002 | 0.002 | 0.002 | 0.002 | 0.002 | 0.002 | 0.002 | 0.002 | 0.002 | 0.002 | 0.002 | 0.002 | 0.002 | 0.002 | 0.002 | 0.002 | 0.002 | 0.002 | 0.002 | 0.002 |
| R13 | 0.181 | 0.181 | 0.181 | 0.181 | 0.181 | 0.181 | 0.181 | 0.181 | 0.181 | 0.181 | 0.181 | 0.181 | 0.181 | 0.181 | 0.181 | 0.181 | 0.181 | 0.181 | 0.181 | 0.181 | 0.181 | 0.181 |
| R14 | 0.050 | 0.050 | 0.050 | 0.050 | 0.050 | 0.050 | 0.050 | 0.050 | 0.050 | 0.050 | 0.050 | 0.050 | 0.050 | 0.050 | 0.050 | 0.050 | 0.050 | 0.050 | 0.050 | 0.050 | 0.050 | 0.050 |
| R15 | 0.071 | 0.071 | 0.071 | 0.071 | 0.071 | 0.071 | 0.071 | 0.071 | 0.071 | 0.071 | 0.071 | 0.071 | 0.071 | 0.071 | 0.071 | 0.071 | 0.071 | 0.071 | 0.071 | 0.071 | 0.071 | 0.071 |
| R16 | 0.003 | 0.003 | 0.003 | 0.003 | 0.003 | 0.003 | 0.003 | 0.003 | 0.003 | 0.003 | 0.003 | 0.003 | 0.003 | 0.003 | 0.003 | 0.003 | 0.003 | 0.003 | 0.003 | 0.003 | 0.003 | 0.003 |
| R17 | 0.044 | 0.044 | 0.044 | 0.044 | 0.044 | 0.044 | 0.044 | 0.044 | 0.044 | 0.044 | 0.044 | 0.044 | 0.044 | 0.044 | 0.044 | 0.044 | 0.044 | 0.044 | 0.044 | 0.044 | 0.044 | 0.044 |

|     |       |       |       |       |       |       |       |       |       |       |       |       |       |       |       |       |       |       |       |       |       |       |
|-----|-------|-------|-------|-------|-------|-------|-------|-------|-------|-------|-------|-------|-------|-------|-------|-------|-------|-------|-------|-------|-------|-------|
| R21 | 0.113 | 0.113 | 0.113 | 0.113 | 0.113 | 0.113 | 0.113 | 0.113 | 0.113 | 0.113 | 0.113 | 0.113 | 0.113 | 0.113 | 0.113 | 0.113 | 0.113 | 0.113 | 0.113 | 0.113 | 0.113 | 0.113 |
| R22 | 0.045 | 0.045 | 0.045 | 0.045 | 0.045 | 0.045 | 0.045 | 0.045 | 0.045 | 0.045 | 0.045 | 0.045 | 0.045 | 0.045 | 0.045 | 0.045 | 0.045 | 0.045 | 0.045 | 0.045 | 0.045 | 0.045 |
| R23 | 0.019 | 0.019 | 0.019 | 0.019 | 0.019 | 0.019 | 0.019 | 0.019 | 0.019 | 0.019 | 0.019 | 0.019 | 0.019 | 0.019 | 0.019 | 0.019 | 0.019 | 0.019 | 0.019 | 0.019 | 0.019 | 0.019 |
| R24 | 0.003 | 0.003 | 0.003 | 0.003 | 0.003 | 0.003 | 0.003 | 0.003 | 0.003 | 0.003 | 0.003 | 0.003 | 0.003 | 0.003 | 0.003 | 0.003 | 0.003 | 0.003 | 0.003 | 0.003 | 0.003 | 0.003 |
| R25 | 0.001 | 0.001 | 0.001 | 0.001 | 0.001 | 0.001 | 0.001 | 0.001 | 0.001 | 0.001 | 0.001 | 0.001 | 0.001 | 0.001 | 0.001 | 0.001 | 0.001 | 0.001 | 0.001 | 0.001 | 0.001 | 0.001 |
| R26 | 0.013 | 0.013 | 0.013 | 0.013 | 0.013 | 0.013 | 0.013 | 0.013 | 0.013 | 0.013 | 0.013 | 0.013 | 0.013 | 0.013 | 0.013 | 0.013 | 0.013 | 0.013 | 0.013 | 0.013 | 0.013 | 0.013 |
| R31 | 0.003 | 0.003 | 0.003 | 0.003 | 0.003 | 0.003 | 0.003 | 0.003 | 0.003 | 0.003 | 0.003 | 0.003 | 0.003 | 0.003 | 0.003 | 0.003 | 0.003 | 0.003 | 0.003 | 0.003 | 0.003 | 0.003 |
| R32 | 0.006 | 0.006 | 0.006 | 0.006 | 0.006 | 0.006 | 0.006 | 0.006 | 0.006 | 0.006 | 0.006 | 0.006 | 0.006 | 0.006 | 0.006 | 0.006 | 0.006 | 0.006 | 0.006 | 0.006 | 0.006 | 0.006 |
| R33 | 0.039 | 0.039 | 0.039 | 0.039 | 0.039 | 0.039 | 0.039 | 0.039 | 0.039 | 0.039 | 0.039 | 0.039 | 0.039 | 0.039 | 0.039 | 0.039 | 0.039 | 0.039 | 0.039 | 0.039 | 0.039 | 0.039 |
| R34 | 0.039 | 0.039 | 0.039 | 0.039 | 0.039 | 0.039 | 0.039 | 0.039 | 0.039 | 0.039 | 0.039 | 0.039 | 0.039 | 0.039 | 0.039 | 0.039 | 0.039 | 0.039 | 0.039 | 0.039 | 0.039 | 0.039 |
| R35 | 0.006 | 0.006 | 0.006 | 0.006 | 0.006 | 0.006 | 0.006 | 0.006 | 0.006 | 0.006 | 0.006 | 0.006 | 0.006 | 0.006 | 0.006 | 0.006 | 0.006 | 0.006 | 0.006 | 0.006 | 0.006 | 0.006 |
| R41 | 0.003 | 0.003 | 0.003 | 0.003 | 0.003 | 0.003 | 0.003 | 0.003 | 0.003 | 0.003 | 0.003 | 0.003 | 0.003 | 0.003 | 0.003 | 0.003 | 0.003 | 0.003 | 0.003 | 0.003 | 0.003 | 0.003 |
| R42 | 0.075 | 0.075 | 0.075 | 0.075 | 0.075 | 0.075 | 0.075 | 0.075 | 0.075 | 0.075 | 0.075 | 0.075 | 0.075 | 0.075 | 0.075 | 0.075 | 0.075 | 0.075 | 0.075 | 0.075 | 0.075 | 0.075 |
| R43 | 0.042 | 0.042 | 0.042 | 0.042 | 0.042 | 0.042 | 0.042 | 0.042 | 0.042 | 0.042 | 0.042 | 0.042 | 0.042 | 0.042 | 0.042 | 0.042 | 0.042 | 0.042 | 0.042 | 0.042 | 0.042 | 0.042 |
| R44 | 0.016 | 0.016 | 0.016 | 0.016 | 0.016 | 0.016 | 0.016 | 0.016 | 0.016 | 0.016 | 0.016 | 0.016 | 0.016 | 0.016 | 0.016 | 0.016 | 0.016 | 0.016 | 0.016 | 0.016 | 0.016 | 0.016 |

Table S13 Expert rating results

|     | 1   | 2   | 3   | 4   | 5   | 6   | 7   | 8   | 9   | 10  |
|-----|-----|-----|-----|-----|-----|-----|-----|-----|-----|-----|
| R11 | 0.7 | 0.6 | 0.6 | 0.4 | 0.6 | 0.5 | 0.4 | 0.6 | 0.5 | 0.7 |
| R12 | 0.2 | 0.2 | 0.1 | 0.2 | 0.2 | 0.1 | 0.1 | 0.1 | 0.3 | 0.1 |
| R13 | 0.6 | 0.7 | 0.5 | 0.5 | 0.6 | 0.5 | 0.4 | 0.5 | 0.6 | 0.7 |
| R14 | 0.3 | 0.4 | 0.2 | 0.3 | 0.5 | 0.4 | 0.3 | 0.4 | 0.5 | 0.3 |
| R15 | 0.5 | 0.5 | 0.4 | 0.6 | 0.3 | 0.4 | 0.4 | 0.6 | 0.4 | 0.3 |
| R16 | 0.1 | 0.2 | 0.3 | 0.2 | 0.2 | 0.1 | 0.1 | 0.1 | 0.2 | 0.1 |
| R17 | 0.4 | 0.3 | 0.2 | 0.3 | 0.2 | 0.5 | 0.3 | 0.3 | 0.3 | 0.4 |
| R21 | 0.5 | 0.6 | 0.4 | 0.5 | 0.5 | 0.4 | 0.6 | 0.5 | 0.5 | 0.4 |
| R22 | 0.4 | 0.3 | 0.3 | 0.2 | 0.2 | 0.3 | 0.5 | 0.3 | 0.4 | 0.3 |
| R23 | 0.2 | 0.1 | 0.3 | 0.1 | 0.3 | 0.1 | 0.4 | 0.2 | 0.1 | 0.3 |
| R24 | 0.1 | 0.2 | 0.3 | 0.2 | 0.2 | 0.1 | 0.1 | 0.1 | 0.2 | 0.1 |
| R25 | 0.2 | 0.2 | 0.1 | 0.1 | 0.1 | 0.1 | 0.2 | 0.1 | 0.2 | 0.1 |
| R26 | 0.2 | 0.2 | 0.1 | 0.1 | 0.2 | 0.4 | 0.1 | 0.2 | 0.1 | 0.3 |
| R31 | 0.1 | 0.2 | 0.3 | 0.2 | 0.2 | 0.1 | 0.1 | 0.1 | 0.2 | 0.1 |
| R32 | 0.1 | 0.2 | 0.2 | 0.1 | 0.3 | 0.3 | 0.1 | 0.2 | 0.1 | 0.2 |
| R33 | 0.4 | 0.2 | 0.3 | 0.5 | 0.2 | 0.2 | 0.2 | 0.3 | 0.3 | 0.2 |
| R34 | 0.3 | 0.2 | 0.4 | 0.5 | 0.2 | 0.2 | 0.2 | 0.3 | 0.3 | 0.2 |
| R35 | 0.2 | 0.1 | 0.1 | 0.1 | 0.3 | 0.3 | 0.1 | 0.2 | 0.1 | 0.2 |
| R41 | 0.1 | 0.2 | 0.3 | 0.2 | 0.2 | 0.1 | 0.1 | 0.1 | 0.2 | 0.1 |
| R42 | 0.5 | 0.4 | 0.5 | 0.6 | 0.5 | 0.3 | 0.6 | 0.4 | 0.4 | 0.3 |
| R43 | 0.3 | 0.4 | 0.5 | 0.1 | 0.3 | 0.2 | 0.3 | 0.3 | 0.1 | 0.3 |
| R44 | 0.2 | 0.3 | 0.1 | 0.1 | 0.2 | 0.4 | 0.1 | 0.1 | 0.2 | 0.3 |

Table S14 The table of Grey evaluation coefficients

| Level 1 Indicators | Level 2 Indicators | Evaluation coefficients for gray clustering of the kth gray class |       |     |       |       | Composite gray evaluation coefficient |
|--------------------|--------------------|-------------------------------------------------------------------|-------|-----|-------|-------|---------------------------------------|
|                    |                    | k=1                                                               | k=2   | k=3 | k=4   | k=5   |                                       |
| R1                 | R11                | 0                                                                 | 2     | 8   | 8     | 6.22  | 24.22                                 |
|                    | R12                | 5                                                                 | 5.33  | 3.2 | 2.286 | 1.778 | 17.594                                |
|                    | R13                | 0                                                                 | 2     | 8.2 | 8     | 6.222 | 24.422                                |
|                    | R14                | 0                                                                 | 7.33  | 7.2 | 5.143 | 4     | 23.673                                |
|                    | R15                | 0                                                                 | 5.33  | 8   | 5.714 | 4.44  | 23.484                                |
|                    | R16                | 5                                                                 | 5.33  | 3.2 | 2.286 | 1.78  | 17.596                                |
|                    | R17                | 0                                                                 | 8     | 6.4 | 4.57  | 3.55  | 22.52                                 |
| R2                 | R21                | 0                                                                 | 3.667 | 9   | 7     | 5.44  | 25.107                                |
|                    | R22                | 0                                                                 | 8     | 6.4 | 4.57  | 3.55  | 22.52                                 |
|                    | R23                | 4                                                                 | 6.33  | 4.2 | 3     | 2.33  | 19.86                                 |
|                    | R24                | 5                                                                 | 5.33  | 3.2 | 2.286 | 1.778 | 17.594                                |
|                    | R25                | 6                                                                 | 4.667 | 2.8 | 2     | 1.556 | 17.023                                |
|                    | R26                | 4                                                                 | 5.667 | 3.8 | 2.71  | 2.11  | 18.287                                |
| R3                 | R31                | 5                                                                 | 5.33  | 3.2 | 2.286 | 1.778 | 17.594                                |
|                    | R32                | 4                                                                 | 6     | 3.6 | 2.57  | 2     | 18.17                                 |
|                    | R33                | 0                                                                 | 7.33  | 5.6 | 4     | 3.11  | 20.04                                 |
|                    | R34                | 0                                                                 | 7.33  | 5.6 | 4     | 3.11  | 20.04                                 |
|                    | R35                | 5                                                                 | 5.667 | 3.4 | 2.43  | 1.889 | 18.386                                |
| R4                 | R41                | 5                                                                 | 5.33  | 3.2 | 2.286 | 1.778 | 17.594                                |
|                    | R42                | 0                                                                 | 5     | 8.2 | 6.429 | 5     | 24.629                                |
|                    | R43                | 2                                                                 | 7.33  | 5.6 | 4     | 3.11  | 22.04                                 |
|                    | R44                | 4                                                                 | 6     | 4   | 2.857 | 2.22  | 19.077                                |

Supplementary Materials S15

BIPV Residential Project Development Risk Identification Questionnaire

Respected experts:

Greetings! Your support for this research is greatly appreciated. The purpose of this questionnaire is to evaluate the WBS-RBS risk identification coupling matrix that has been developed in this paper for the entire life cycle of BIPV residential project development. The first line indicates the manner in which the project’s work elements are partitioned into phases, comprising 16 items in total. The 27 items comprising the elements of

risk classified by the risk decomposition structure are displayed in the first column. When identifying risks, please assign a numerical value between 0 and 1 to each identified risk and determine whether or not the corresponding risk point exists. A value of "1" suggests the occurrence or likelihood of a similar risk, whereas a value of "0" signifies the absence of or its negligible probability of emerging. Kindly complete the form in an unbiased and fair manner. Sincerely, best of luck with your work, thanks!

WBS-RBS Risk Coupling Matrix for BIPV Residential Project Development

| Risk factors                                      | Market research             | Feasibility studies | Financing preparation | Project Filing     | Development project approval   | Bidding for design units               | Project design          | Load forecasting             |
|---------------------------------------------------|-----------------------------|---------------------|-----------------------|--------------------|--------------------------------|----------------------------------------|-------------------------|------------------------------|
| Project finance r                                 |                             |                     |                       |                    |                                |                                        |                         |                              |
| Incremental cost                                  |                             |                     |                       |                    |                                |                                        |                         |                              |
| Electricity billing                               |                             |                     |                       |                    |                                |                                        |                         |                              |
| Feed-in tariff                                    |                             |                     |                       |                    |                                |                                        |                         |                              |
| Tendering methods and contractor qualifications   |                             |                     |                       |                    |                                |                                        |                         |                              |
| Security management                               |                             |                     |                       |                    |                                |                                        |                         |                              |
| Progress management                               |                             |                     |                       |                    |                                |                                        |                         |                              |
| Contract management                               |                             |                     |                       |                    |                                |                                        |                         |                              |
| Cost management                                   |                             |                     |                       |                    |                                |                                        |                         |                              |
| Inadequate design codes and standards             |                             |                     |                       |                    |                                |                                        |                         |                              |
| Incomplete policies and regulations               |                             |                     |                       |                    |                                |                                        |                         |                              |
| Inadequate acceptance criteria                    |                             |                     |                       |                    |                                |                                        |                         |                              |
| Impact of force majeure factors                   |                             |                     |                       |                    |                                |                                        |                         |                              |
| BIPV Market supply                                |                             |                     |                       |                    |                                |                                        |                         |                              |
| Load forecasting                                  |                             |                     |                       |                    |                                |                                        |                         |                              |
| Consumer acceptability                            |                             |                     |                       |                    |                                |                                        |                         |                              |
| Project Programming                               |                             |                     |                       |                    |                                |                                        |                         |                              |
| Masterplan design                                 |                             |                     |                       |                    |                                |                                        |                         |                              |
| Project Location                                  |                             |                     |                       |                    |                                |                                        |                         |                              |
| Grid connection                                   |                             |                     |                       |                    |                                |                                        |                         |                              |
| Project integrated design                         |                             |                     |                       |                    |                                |                                        |                         |                              |
| Maintenance technology for photovoltaic equipment |                             |                     |                       |                    |                                |                                        |                         |                              |
|                                                   | Grid-connected declarations | Project bidding     | Completion stage      | Construction phase | Construction preparation phase | Grid connection acceptance application | Equipment commissioning | Detecting operational status |
| Project finance                                   |                             |                     |                       |                    |                                |                                        |                         |                              |
| Incremental cost                                  |                             |                     |                       |                    |                                |                                        |                         |                              |
| Electricity billing                               |                             |                     |                       |                    |                                |                                        |                         |                              |
| Feed-in tariff risk                               |                             |                     |                       |                    |                                |                                        |                         |                              |
| Tendering methods and contractor qualifications   |                             |                     |                       |                    |                                |                                        |                         |                              |

|                                                   |  |  |  |  |  |  |  |  |
|---------------------------------------------------|--|--|--|--|--|--|--|--|
| Security management                               |  |  |  |  |  |  |  |  |
| Progress management                               |  |  |  |  |  |  |  |  |
| Contract management                               |  |  |  |  |  |  |  |  |
| Cost management                                   |  |  |  |  |  |  |  |  |
| Inadequate design codes and standards             |  |  |  |  |  |  |  |  |
| Incomplete policies and regulations               |  |  |  |  |  |  |  |  |
| Inadequate acceptance criteria                    |  |  |  |  |  |  |  |  |
| Impact of force majeure factors                   |  |  |  |  |  |  |  |  |
| BIPV Market supply                                |  |  |  |  |  |  |  |  |
| Load forecasting                                  |  |  |  |  |  |  |  |  |
| Consumer acceptability                            |  |  |  |  |  |  |  |  |
| Project Programming                               |  |  |  |  |  |  |  |  |
| Masterplan design                                 |  |  |  |  |  |  |  |  |
| Project Location                                  |  |  |  |  |  |  |  |  |
| Grid connection                                   |  |  |  |  |  |  |  |  |
| Project integrated design                         |  |  |  |  |  |  |  |  |
| Maintenance technology for photovoltaic equipment |  |  |  |  |  |  |  |  |
| Project finance                                   |  |  |  |  |  |  |  |  |
| Incremental cost                                  |  |  |  |  |  |  |  |  |
| Electricity billing                               |  |  |  |  |  |  |  |  |
| Feed-in tariff                                    |  |  |  |  |  |  |  |  |
| Tendering methods and contractor qualifications   |  |  |  |  |  |  |  |  |
| Security management                               |  |  |  |  |  |  |  |  |
| Progress management                               |  |  |  |  |  |  |  |  |
| Contract management                               |  |  |  |  |  |  |  |  |
| Cost management                                   |  |  |  |  |  |  |  |  |
| Inadequate design codes and standards             |  |  |  |  |  |  |  |  |

Supplementary Materials S16

BIPV Residential Development Risk Factors Expert Interview Questionnaire

Dear Ms./Mr.:

Greetings! To begin with, I would like to extend my sincere appreciation for your time in managing your busy schedule to participate in this survey!

As a master’s candidate Nanjing Forestry University, I am working on my dissertation titled "An investigation into the Risk Assessment of BIPV Residential Project Development Utilizing the DEMATEL-ANP Methodology— — Take a project in China as an example". The objective of this questionnaire was to investigate "the importance of risk factors in BIPV residential development".

Following an extensive review of relevant literature and data analysis, this paper screens 22 risk factors associated with BIPV residential development. To enhance the validity and efficacy of the evaluation index, kindly assess the significance of the 22 influencing factors based on your understanding and practical experience in PV building integration.

Here we express our gratitude for your cooperation!  
Best of luck with your professional endeavor and happiness!

Nanjing Forestry University  
July 2023

Part 1: Your Basic Information

- 1    Your Occupation:  
      A an academic instructor B a Practitioner in Construction C a Photovoltaic Practitioner D Government employee E Others
- 2    To what extent do you understand policies related to the construction sector in the context of carbon neutrality:  
      A have never heard of it B am very ignorant of it C am only marginally knowledgeable D am extremely knowledgeable
- 3    What would be your perception of the transformation of the construction industry in a carbon-neutral situation:  
      A Passive House Construction B Assembly Building C Green Building D Photovoltaic and Building Integration E Others
- 4    Have you encountered anything in your life concerning photovoltaics or photovoltaic building integration?  
      A Undoubtedly not B Negligible C Fairly well D Very well
- 5    What is your perspective regarding the integration of photovoltaic systems into residential buildings?  
      A Dangerous B unknown C Energy-conserving
- 6    Consider yourself within a residence that has been integrated with photovoltaic technology, , your inner thoughts are:  
      A green B advanced and intelligent C hazardous D prone to accidents
- 7    Would you be interested in purchasing electricity generated by the combination of photovoltaics and buildings for residential and industrial use?  
      A extremely reluctant B moderately willing C somewhat willing D extremely willing
- 8    Should the degree of PV integration with building design and construction be firmly established, would you consider making a purchase of it?  
      A extremely reluctant B moderately willing C somewhat willing D extremely willing

Part 2: This section examines the significance of 22 risk factors affecting BIPV residential development. Kindly assess the significance of the influencing factors regarding the current state of the development of BIPV residential projects in China and your own professional and social background, and indicate with a checkmark in the corresponding table. (Evaluations were determined using a 5-point Likert scale, where 1-irrelevant, 2-unimportant, 3-average, 4-important, and 5-extremely important.)

BIPV Residential Development Risk Factor Questionnaire

| Serial number | Risk factors                                   | Degree of impact |   |   |   |   |
|---------------|------------------------------------------------|------------------|---|---|---|---|
|               |                                                | 1                | 2 | 3 | 4 | 5 |
| 1             | Consumer acceptance                            |                  |   |   |   |   |
| 2             | BIPV Market Supply                             |                  |   |   |   |   |
| 3             | Project finance                                |                  |   |   |   |   |
| 4             | Project location                               |                  |   |   |   |   |
| 5             | Incremental cost                               |                  |   |   |   |   |
| 6             | Feed-in tariff                                 |                  |   |   |   |   |
| 7             | Changes in policies and regulations            |                  |   |   |   |   |
| 8             | Master Plan Design                             |                  |   |   |   |   |
| 9             | Load forecasting                               |                  |   |   |   |   |
| 10            | Poor program design                            |                  |   |   |   |   |
| 11            | Project Integration and Design                 |                  |   |   |   |   |
| 12            | Tendering methods and contractor qualification |                  |   |   |   |   |
| 13            | Inadequate design codes and standards          |                  |   |   |   |   |
| 14            | Security management                            |                  |   |   |   |   |
| 15            | Inadequate criteria for quality acceptance     |                  |   |   |   |   |
| 16            | Cost management                                |                  |   |   |   |   |
| 17            | Progress management                            |                  |   |   |   |   |
| 18            | Contract management                            |                  |   |   |   |   |
| 19            | Technical risk of PV equipment maintenance     |                  |   |   |   |   |
| 20            | Grid connection                                |                  |   |   |   |   |
| 21            | Force majeure                                  |                  |   |   |   |   |
| 22            | Cost management                                |                  |   |   |   |   |



Supplementary Materials S17

Questionnaire for two-by-two comparison of the degree of dominance of risk indicators for risk assessment of BIPV residential projects  
Dear Ms./Mr.

We express our gratitude for your attention to this survey. This questionnaire is an extension of the second questionnaire , which aimed to obtain the interactions between risk indicators in order to generate a two-by-two dominance comparison matrix. I hope that you will utilize this questionnaire to provide feedback regarding the dominance of the first and second levels of risk indicators. The references between the risk indicators are detailed in the table below:

| References between risk indicators for BIPV residential project development |                                                                                                                                                                                                                                                                                                                                |
|-----------------------------------------------------------------------------|--------------------------------------------------------------------------------------------------------------------------------------------------------------------------------------------------------------------------------------------------------------------------------------------------------------------------------|
| Standardized layer                                                          | Indicator layer                                                                                                                                                                                                                                                                                                                |
| Pre-decision phase exposures<br>R1                                          | Risk of inadequate policies and regulations (R11)<br>BIPV market supply risk(R12)<br>Project finance risks(R13)<br>Site selection risks (R14)<br>Risk of consumer acceptance(R15)<br>Feed-in tariff risk(R16)<br>Incremental cost risk(R17)                                                                                    |
| Preparation and design phase exposures<br>R2                                | Risk of poor project master planning(R21)<br>Risk of load forecasting accuracy(R22)<br>Risk of poor project program design(R23)<br>Risks to the level of integrated project design(R24)<br>Tendering methods and contractor qualification risks(R25)<br>Risk of not improving design codes, standards and related atlases(R26) |
| Project implementation phase exposures<br>R3                                | Construction safety risks(R31)<br>Risk of inadequate criteria for quality acceptance (R32)<br>Risks in construction cost management(R33)<br>Risks of construction schedule management(R34)<br>Construction contract management risks(R35)                                                                                      |
| Operation and maintenance phase exposures<br>R4                             | Risk of not having well-established technical standards for PV equipment maintenance(R41)<br>Grid acceptance and commissioning risks(R42)<br>Risk of regular billing for electricity(R43)<br>Risk of inoperability due to natural disasters(R44)                                                                               |

This survey utilized a 1-9 scale to assign scores, where positive and negative values indicated degrees of dominance . This survey was conducted using the Super decision software, as illustrated below.

1. Choose

Node Cluster

Choose Node

R17

Cluster: R1

Choose Cluster

R1

2. Node comparisons with respect to R17

Graphical Verbal Matrix Questionnaire Direct

Comparisons wrt "R17" node in "R1" cluster

R11 is moderately more important than R12

1. R11

>=9.5

9

8

7

6

5

4

3

2

1

2

3

4

5

6

7

8

9

>=9.5

No comp.

R12

2. R11

>=9.5

9

8

7

6

5

4

3

2

1

2

3

4

5

6

7

8

9

>=9.5

No comp.

R13

3. R11

>=9.5

9

8

7

6

5

4

3

2

1

2

3

4

5

6

7

8

9

>=9.5

No comp.

R14

4. R11

>=9.5

9

8

7

6

5

4

3

2

1

2

3

4

5

6

7

8

9

>=9.5

No comp.

R16

5. R12

>=9.5

9

8

7

6

5

4

3

2

1

2

3

4

5

6

7

8

9

>=9.5

No comp.

R13

6. R12

>=9.5

9

8

7

6

5

4

3

2

1

2

3

4

5

6

7

8

9

>=9.5

No comp.

R14

7. R12

>=9.5

9

8

7

6

5

4

3

2

1

2

3

4

5

6

7

8

9

>=9.5

No comp.

R16

8. R13

>=9.5

9

8

7

6

5

4

3

2

1

2

3

4

5

6

7

8

9

>=9.5

No comp.

R14

9. R13

>=9.5

9

8

7

6

5

4

3

2

1

2

3

4

5

6

7

8

9

>=9.5

No comp.

R16

10. R14

>=9.5

9

8

7

6

5

4

3

2

1

2

3

4

5

6

7

8

9

>=9.5

No comp.

R16

Supplementary Materials S18

Respected experts:

Greetings! Your support in this research is greatly appreciated. The purpose of this questionnaire is to assess the risk level. This study classifies the risk associated with the development of BIPV residential project into five distinct levels: "extremely low", "low", "medium", "high", and "extremely high" . These levels are determined by the probability of occurrence, severity of loss, and controllability of the risk, in that order from low to high. The range of values for risk measurement is represented by the number of intervals [0,1], and the set of rubrics and evaluation criteria are illustrated in the table.

Kindly assign an objective and fair score to the risk level referenced in the table provided. Your participation in this survey is highly appreciated, and I extend my best wishes for your continued happiness!

| Evaluation criterion. |                           |                                                                                                                                                                                                    |
|-----------------------|---------------------------|----------------------------------------------------------------------------------------------------------------------------------------------------------------------------------------------------|
| Risk level            | Scope of risk measurement | Evaluation criteria                                                                                                                                                                                |
| low                   | [0,0.2]                   | This risk has an exceedingly low probability of occurrence and exerts a nearly negligible impact on the project when it occurs.                                                                    |
| relatively low        | (0.2,0.4)                 | This risk has a low probability of occurrence, and exerts a low impact and loss on the project when it occurs, and does not impede the accomplishment of the project objectives.                   |
| moderate              | (0.4,0.6]                 | This risk has a moderate probability of occurrence and may cause a moderate amount of damage and financial loss to the project when it occurs, but measures can be taken to restore normalcy.      |
| high                  | (0.6,0.8]                 | This risk has a high probability of occurrence, it could result in significant loss and damage to the project when it occurs.                                                                      |
| extremely high        | (0.8,1]                   | This risk has a high probability of occurrence. Its occurrence can have serious impacts and result in substantial repercussions for the project, ultimately impeding the achievement of its goals. |

**Risk Level Scoring Scale**

| Standardized layer                              | Indicator layer                                                                           | Scoring |
|-------------------------------------------------|-------------------------------------------------------------------------------------------|---------|
| Pre-decision phase exposures<br>R1              | Risk of inadequate policies and regulations (R11)                                         |         |
|                                                 | BIPV market supply risk(R12)                                                              |         |
|                                                 | Project finance risks(R13)                                                                |         |
|                                                 | Site selection risks (R14)                                                                |         |
|                                                 | Risk of consumer acceptance(R15)                                                          |         |
|                                                 | Feed-in tariff risk(R16)                                                                  |         |
|                                                 | Incremental cost risk(R17)                                                                |         |
| Preparation and design phase exposures<br>R2    | Risk of poor project master planning(R21)                                                 |         |
|                                                 | Risk of load forecasting accuracy(R22)                                                    |         |
|                                                 | Risk of poor project program design(R23)                                                  |         |
|                                                 | Risks to the level of integrated project design(R24)                                      |         |
|                                                 | Tendering methods and contractor qualification risks(R25)                                 |         |
|                                                 | Risk of not improving design codes, standards and related atlases(R26)                    |         |
| Project implementation phase exposures<br>R3    | Construction safety risks(R31)                                                            |         |
|                                                 | Risk of inadequate criteria for quality acceptance (R32)                                  |         |
|                                                 | Risks in construction cost management(R33)                                                |         |
|                                                 | Risks of construction schedule management(R34)                                            |         |
|                                                 | Construction contract management risks(R35)                                               |         |
| Operation and maintenance phase exposures<br>R4 | Risk of not having well-established technical standards for PV equipment maintenance(R41) |         |
|                                                 | Grid acceptance and commissioning risks(R42)                                              |         |
|                                                 | Risk of regular billing for electricity(R43)                                              |         |
|                                                 | Risk of inoperability due to natural disasters(R44)                                       |         |
